# Supplementary material for: Evaluation of the Anticancer and DNA-Binding Characteristics of Dichloro(diimine)zinc(II) Complexes
Source: MDPI journal article supplement (doi:10.3390/chemistry3040086), 2021-10-11
Supplement: s1 [file s1]

## Evaluation of the Anticancer and DNA-binding Characteristics of Dichloro(diimine)zinc(II) Complexes

<sup>1</sup> Department of Chemistry, Faculty of Science, King Abdulaziz University, P.O. Box 80203, Jeddah 21589, Saudi Arabia.

<sup>2</sup> Department of Chemistry, College of Science, University of Jeddah, Jeddah 21589, Saudi Arabia.

<sup>3</sup> Department of Chemistry, Faculty of Science, Taif University, Al-Haweiah, P.O. Box 888, Taif 21974, Saudi Arabia.

<sup>4</sup> Department of Chemistry, Faculty of Science, Port Said University, Port Said 42521, Egypt.

\* Correspondence: [bbabgi@kau.edu.sa](mailto:bbabgi@kau.edu.sa)

**Characterization of Zn-1:** White powder, IR (solid,  $\nu$  in  $\text{cm}^{-1}$ ): 1596, 1586, 1509, 1435, 1382, 1367, 1216, 1146, 1106, 973, 957, 873, 834, 784, 749, 685.  $^1\text{H-NMR}$   $\delta$ : 7.70 (t, 2H, biq), 7.87 (t, 2H, biq), 8.09 (d, 2H, biq), 8.20 (d, 2H, biq), 8.60 (d, 2H, biq), 8.82 (d, 2H, biq). Anal. Calcd for  $\text{C}_{18}\text{H}_{12}\text{Cl}_2\text{N}_2\text{Zn}$ : C, 55.07; H, 3.01; N, 8.37%; found: C, 54.71; H, 2.65; N, 7.94%.

**Characterization of Zn-2:** White powder, IR (solid,  $\nu$  in  $\text{cm}^{-1}$ ): 1671, 1605, 1470, 1446, 1359, 1303, 1286, 1270, 1237, 1190, 1161, 1140, 1080, 1058, 1028, 942, 795, 775, 763, 680, 650, 632, 609.  $^1\text{H-NMR}$   $\delta$ : 7.66 (t, 2H, py), 7.99 (d, 2H, py), 8.05 (t, 2H, py), 8.69 (d, 2H, py). Anal. Calcd for  $\text{C}_{11}\text{H}_8\text{Cl}_2\text{N}_2\text{OZn}$ : C, 41.22; H, 2.52; N, 8.74%; found: C, 40.84; H, 2.17; N, 8.31%.

**Characterization of Zn-3:** Yellow powder, IR (solid,  $\nu$  in  $\text{cm}^{-1}$ ): 3338, 3060, 1622, 1593, 1556, 1514, 1477, 1460, 1445, 1368, 1288, 1218, 1174, 1128, 1105, 1024, 913, 843, 805, 779, 746, 647.  $^1\text{H-NMR}$   $\delta$ : 6.80 (br, 2H,  $\text{C}_6\text{H}_4\text{-4-OH}$ ), 7.37 (br, 2H,  $\text{C}_6\text{H}_4\text{-4-N=C}$ ), 7.66 (br, 1H, py), 8.08 (br, 2H, py), 8.69 (s, 1H, azomethine), 8.82 (br, 1H, py), 9.74 (br, 1H, OH). Anal. Calcd for  $\text{C}_{12}\text{H}_{10}\text{Cl}_2\text{N}_2\text{OZn}$ : C, 43.09; H, 3.01; N, 8.37%; found: C, 42.74; H, 2.63; N, 8.46%.

**Characterization of Pt-1:** Orange powder, IR (solid,  $\nu$  in  $\text{cm}^{-1}$ ): 1617, 1595, 1583, 1510, 1431, 1377, 1361, 1286, 1216, 1142, 980, 862, 830, 778, 745, 698.  $^1\text{H-NMR}$   $\delta$ : 7.71 (t, 2H, biq), 7.88 (t, 2H, biq), 8.10 (d, 2H, biq), 8.21 (d, 2H, biq), 8.61 (d, 2H, biq), 8.82 (d, 2H, biq). Anal. Calcd for  $\text{C}_{18}\text{H}_{12}\text{Cl}_2\text{N}_2\text{Pt}$ : C, 41.39; H, 2.32; N, 5.36%; found: C, 41.84; H, 2.69; N, 5.44%.

**Characterization of Pt-2:** Yellow powder, IR (solid,  $\nu$  in  $\text{cm}^{-1}$ ): 1681, 1596, 1565, 1478, 1445, 1315, 1282, 1247, 1189, 1169, 1105, 1070, 1038, 975, 944, 815, 772, 758, 731, 692, 667, 609.  $^1\text{H-NMR}$   $\delta$ : 7.88 (dt, 2H, py), 7.18 (dd, 2H, py), 8.39 (dt, 2H, py), 9.13 (d, 2H, py). Anal. Calcd for  $\text{C}_{11}\text{H}_8\text{Cl}_2\text{N}_2\text{OPt}$ : C, 29.35; H, 1.79; N, 6.22%; found: C, 29.04; H, 1.98; N, 5.89%.

**Characterization of Pt-3:** Orange powder, IR (solid,  $\nu$  in  $\text{cm}^{-1}$ ): 3340, 3065, 1616, 1595, 1504, 1476, 1355, 1291, 1260, 1210, 1159, 1103, 982, 934, 837, 776, 740, 645, 596.  $^1\text{H-NMR}$   $\delta$ : 6.85 (d,  $^3J_{\text{HH}} = 7$  Hz, 2H,  $\text{C}_6\text{H}_4\text{-4-OH}$ ), 7.37 (d,  $^3J_{\text{HH}} = 7$  Hz, 2H,  $\text{C}_6\text{H}_4\text{-4-OH}$ ), 7.98 (t,  $^3J_{\text{HH}} = 7$  Hz,  $^3J_{\text{HH}} = 6$  Hz, 1H, py), 8.19 (d,  $^3J_{\text{HH}} = 8$  Hz, 1H, py), 8.41 (t,  $^3J_{\text{HH}} = 8$  Hz, 1H, py), 9.23 (s, 1H, azomethine), 9.48 (d,  $^3J_{\text{HH}} = 6$  Hz, 1H, py), 9.96 (s, 1H, OH). Anal. Calcd for  $\text{C}_{12}\text{H}_{10}\text{Cl}_2\text{N}_2\text{OPt}$ : C, 31.05; H, 2.17; N, 6.03%; found: C, 30.82; H, 1.91; N, 6.46%.

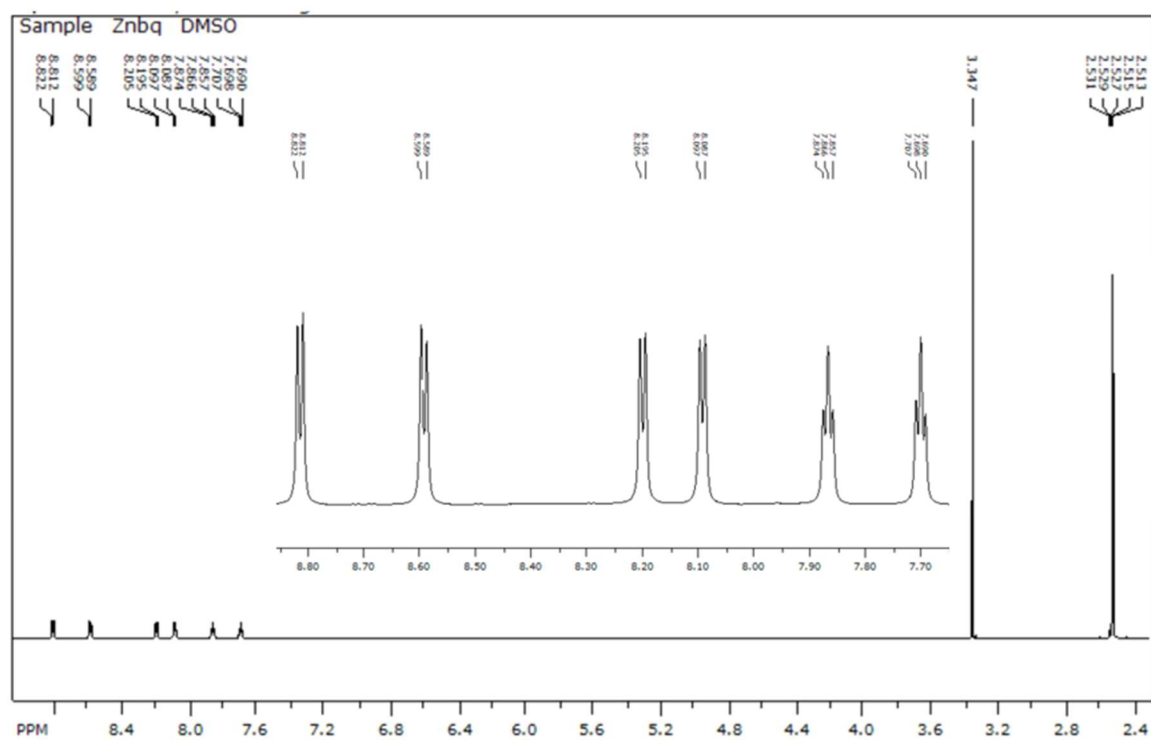

Figure S1.  $^1\text{H}$  NMR of complex Zn-1.

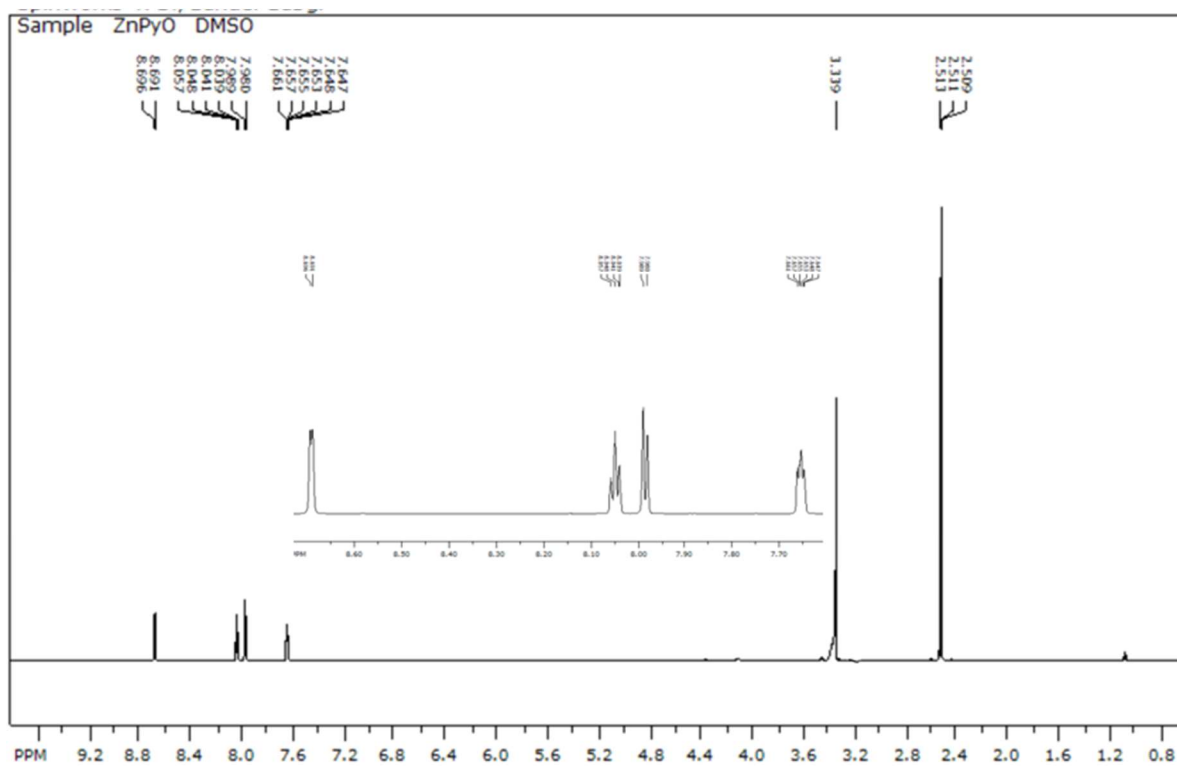

Figure S2.  $^1\text{H}$  NMR of complex Zn-2.

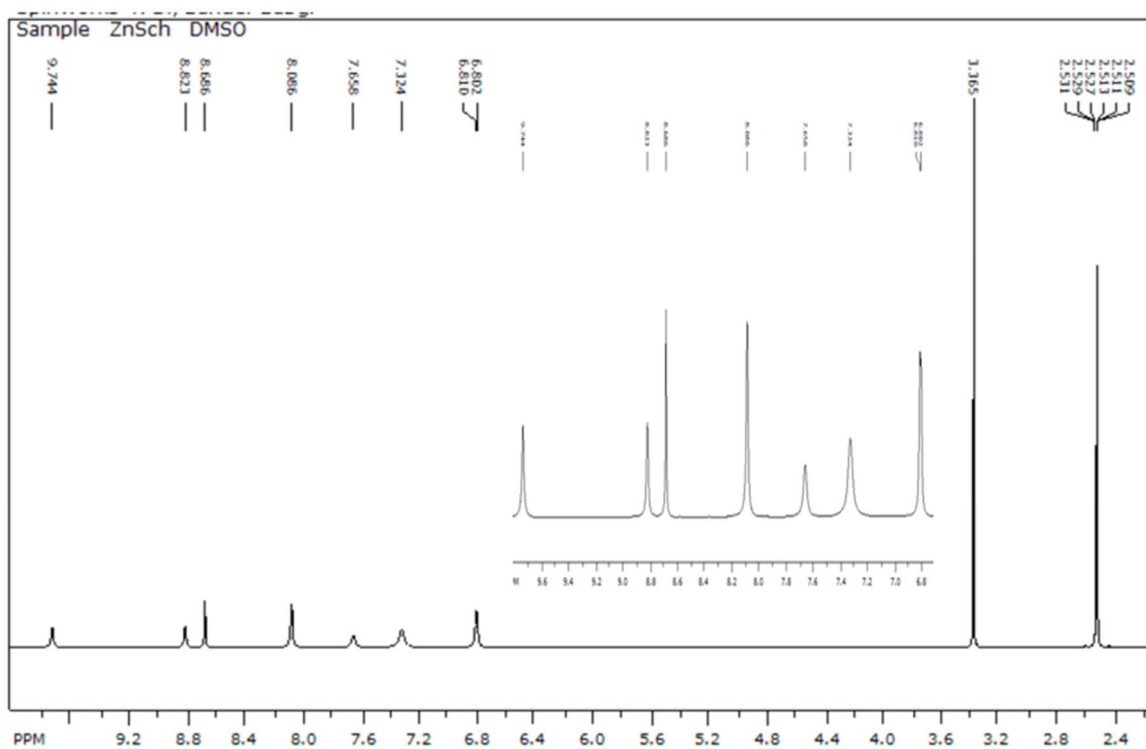

Figure S3.  $^1\text{H}$  NMR of complex Zn-3.

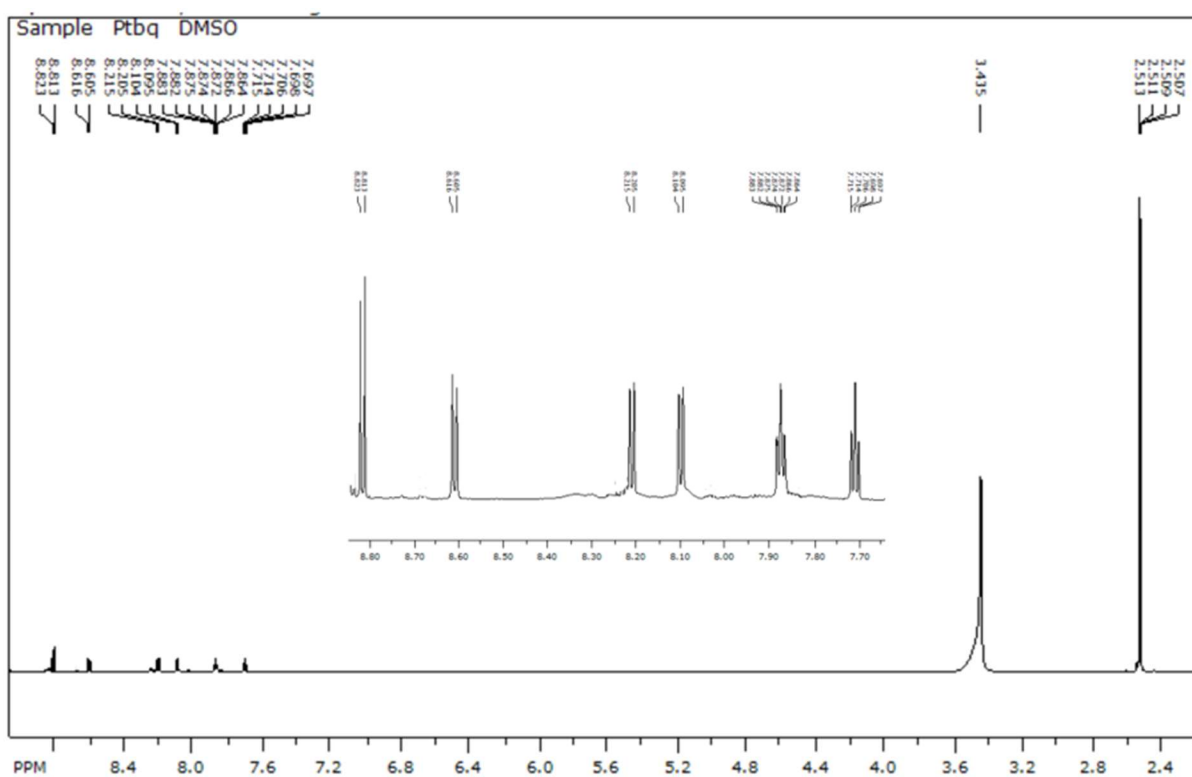

Figure S4.  $^1\text{H}$  NMR of complex Pt-1.



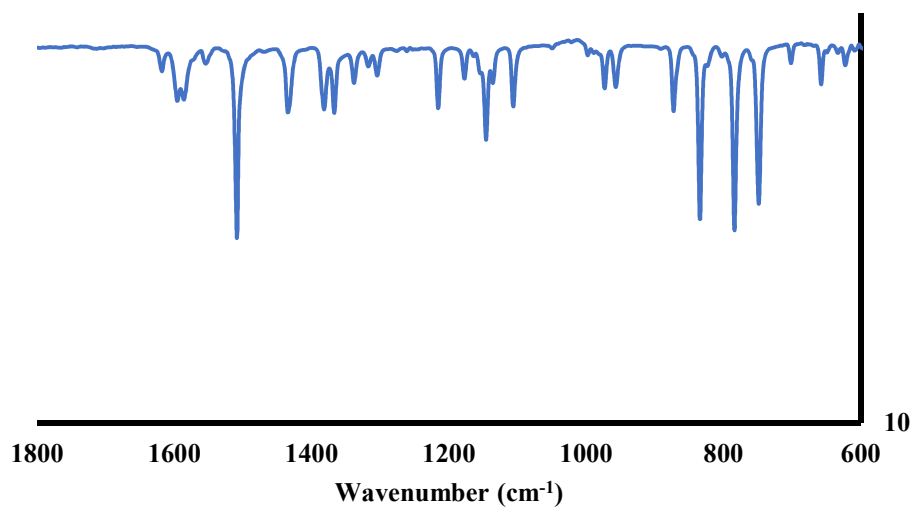

Figure S7. IR spectrum of Zn-1.

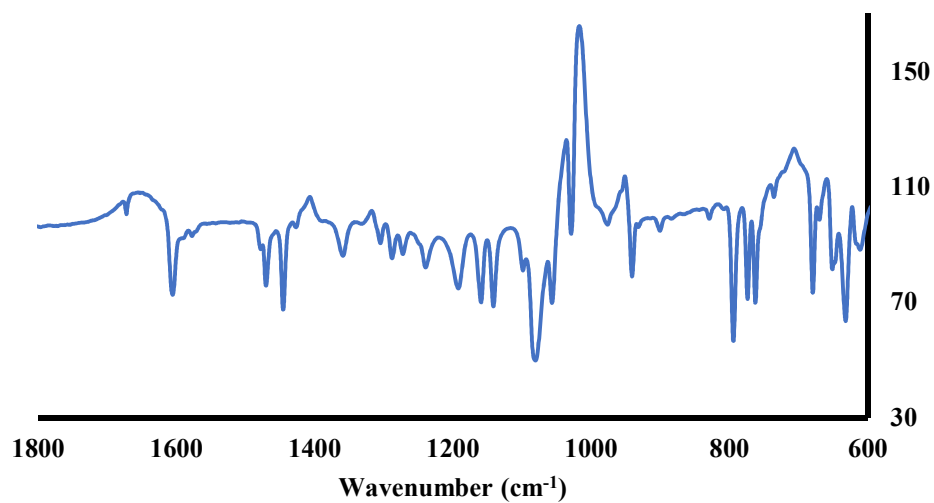

Figure S8. IR spectrum of Zn-2.

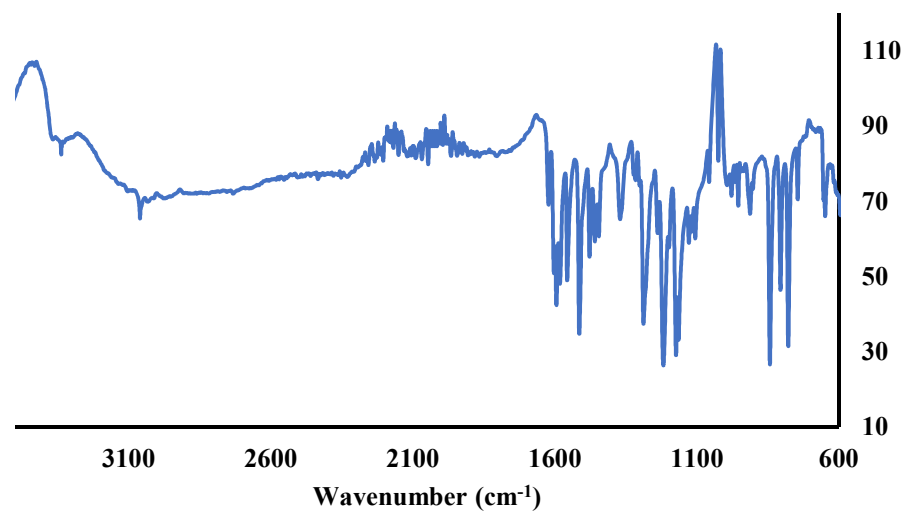

Figure S9. IR spectrum of Zn-3.

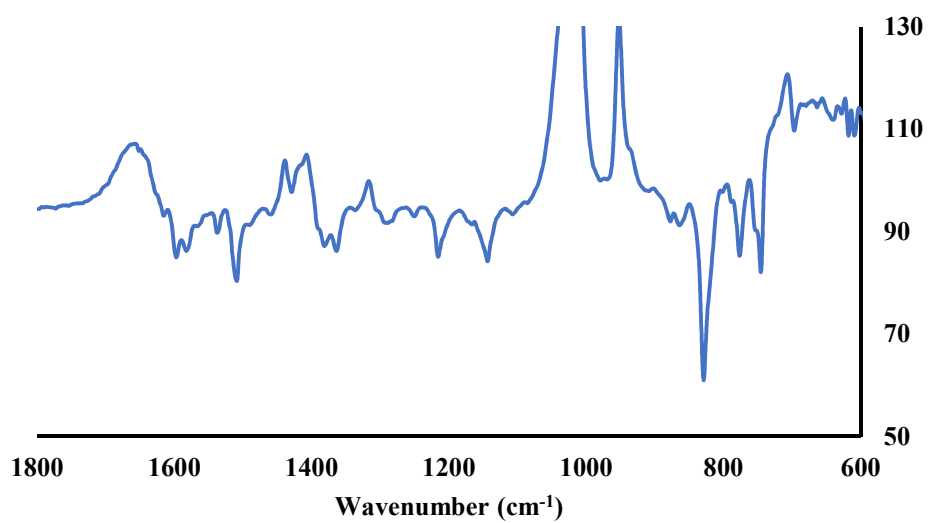

Figure S10. IR spectrum of Pt-1.

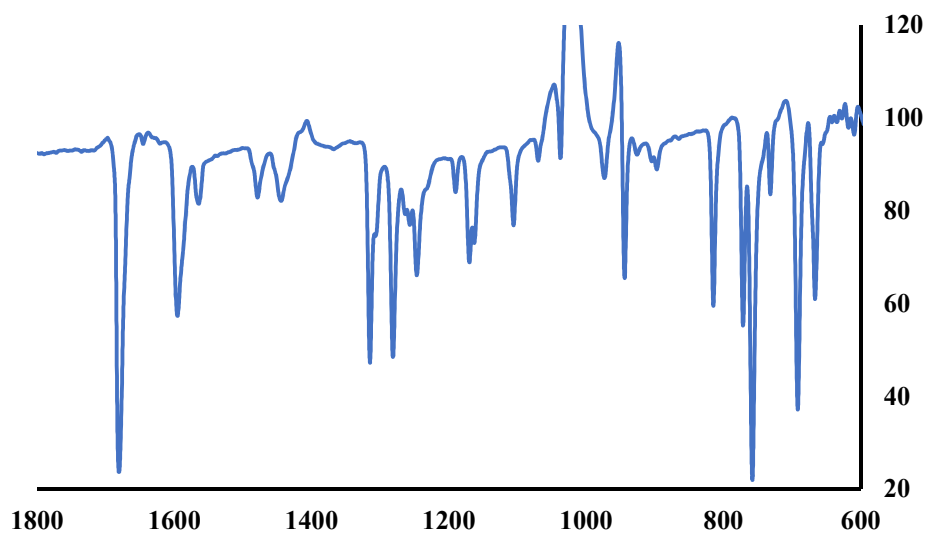

Figure S11. IR spectrum of Pt-2.

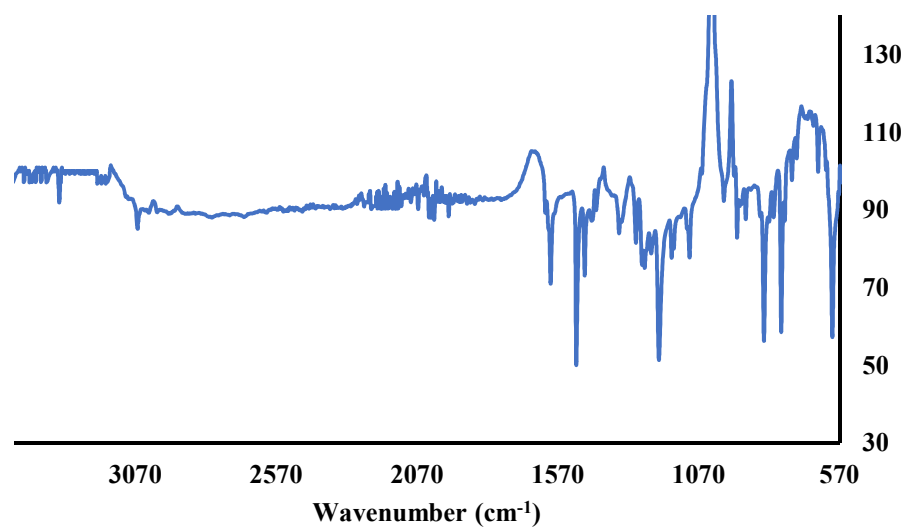

Figure S12. IR spectrum of Pt-3.

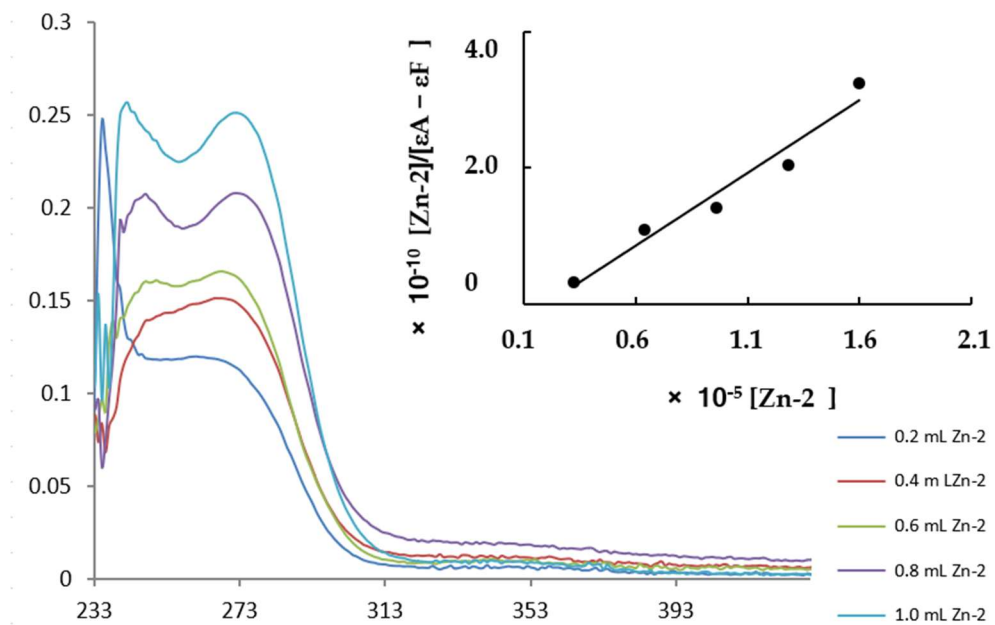

Figure S13. DNA binding studies of Zn-2.

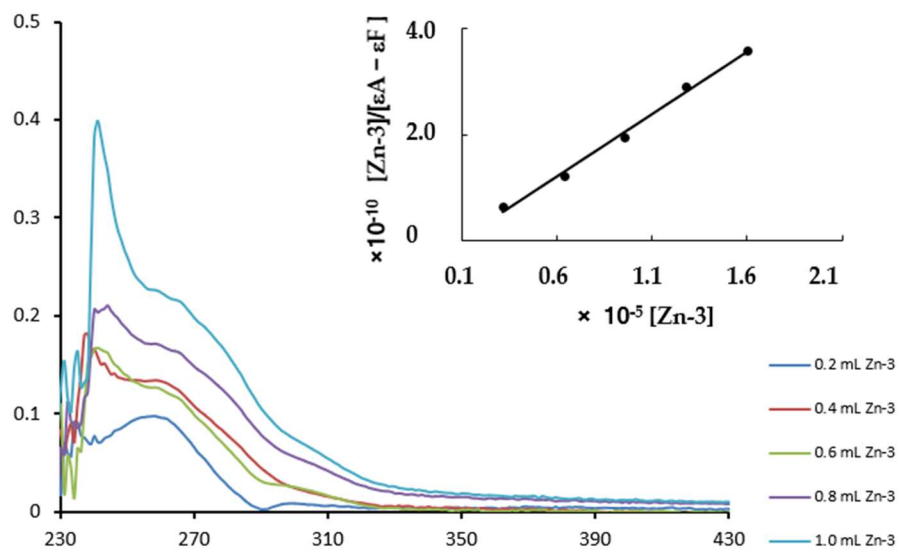

Figure S14. DNA binding studies of Zn-3.



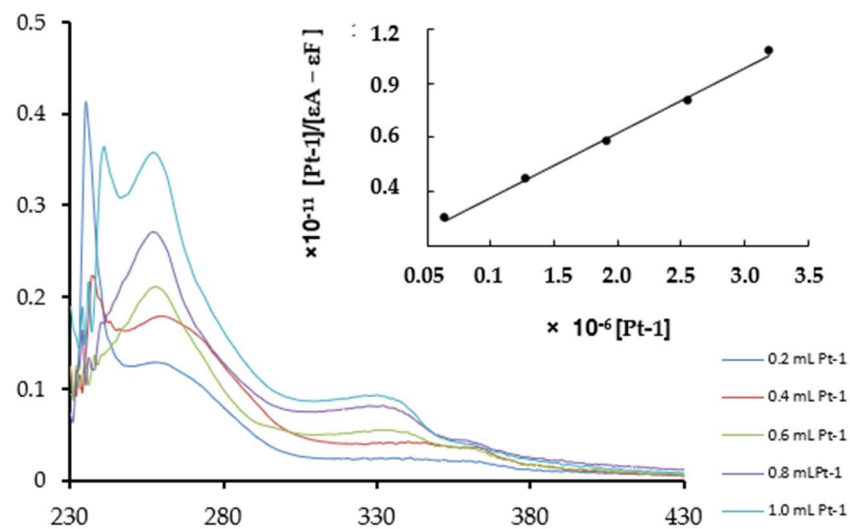

Figure S15. DNA binding studies of Pt-1.

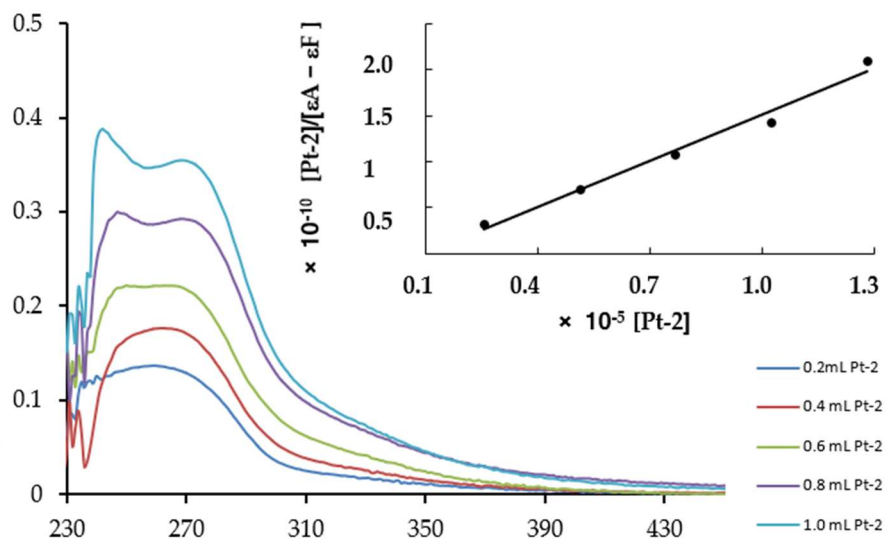

Figure S16. DNA binding studies of Pt-2.

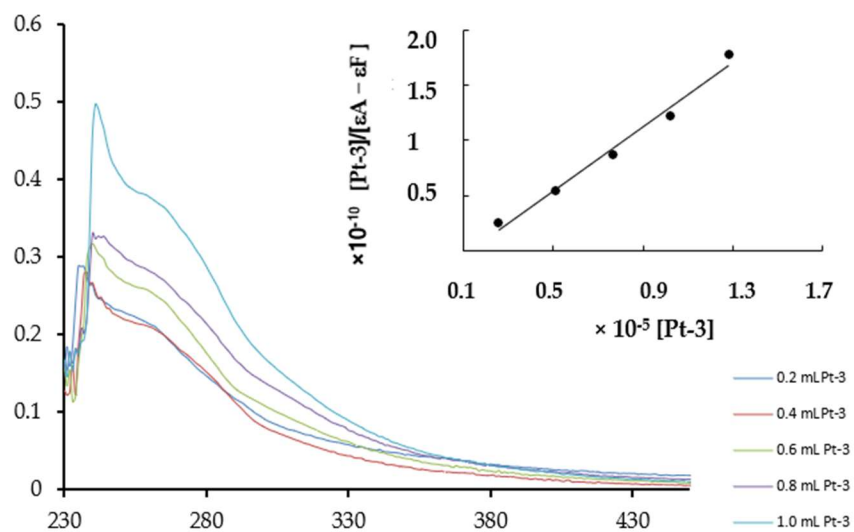

Figure S17. DNA binding studies of Pt-3.

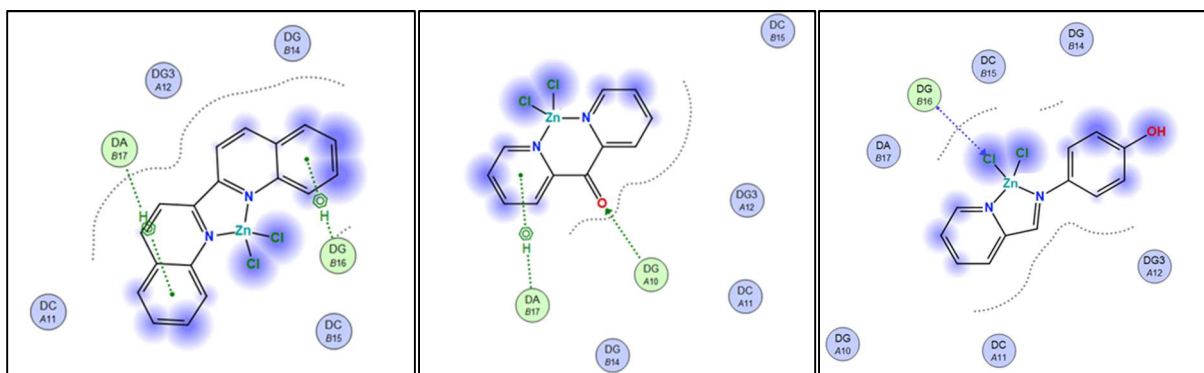

Figure S18. 2D illustration of DNA-zinc complexes adducts as obtained by molecular docking.

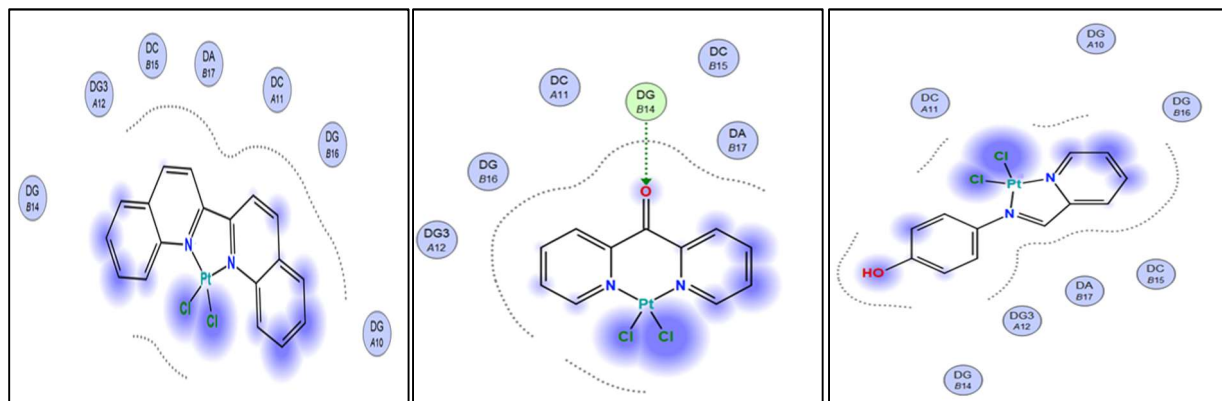

Figure S19. 2D illustration of DNA-zinc complexes adducts as obtained by molecular docking.
